# Supplementary material for: Establishing reference values for macro- and microvascular measurements in 4-to-5 year-old children of the ENVIRONAGE prospective birth cohort
Source: PubMed Central journal article supplement (PMC7083909; doi:10.1038/s41598-020-61987-z), 2020-03-20
Supplement: 41598_2020_61987_MOESM1_ESM.pdf [file 41598_2020_61987_MOESM1_ESM.pdf]

## Supplemental material

### Establishing reference values for macro- and microvascular measurements in 4-to-5 year-old children of the ENVIRONAGE prospective birth cohort

Narjes Madhloum<sup>1</sup>, Leen J. Luyten<sup>1,2</sup>, Eline B. Provost<sup>1,3</sup>, Patrick De Boever<sup>1,3</sup>, Yinthe Dockx<sup>1</sup>, Hanne Sleurs<sup>1</sup>, Michelle Plusquin<sup>1</sup>, Jos op't Roodt<sup>1,4</sup>, Karen Vrijens<sup>1</sup>, Tim S. Nawrot<sup>1,5\*</sup>

<sup>1</sup>Centre for Environmental Sciences, Hasselt University, Hasselt, Belgium.

<sup>2</sup>Unité de Recherche en Biologie Cellulaire (URBC) - Namur Research Institute for Life Sciences (Narilis), Namur University, Namur, Belgium.

<sup>3</sup>Health Unit, Flemish Institute for Technological Research (VITO), Mol, Belgium.

<sup>4</sup>Department of Internal Medicine, Maastricht University Medical Centre (MUMC+), Maastricht, The Netherlands.

<sup>5</sup>Department of Public Health & Primary Care, Occupational and Environmental Medicine, Leuven University, Leuven, Belgium.

\*Correspondence:

Prof. Dr. T.S. Nawrot, Centre for Environmental Sciences, Hasselt University, Agoralaan Building D, 3590 Diepenbeek, Belgium. Telephone: 32-11-268382. Fax: 32-11-268299. E-mail:

[tim.nawrot@uhasselt.be](mailto:tim.nawrot@uhasselt.be)

Table S1. Percentile tables for macrovascular characteristics for children aged 4-6 years.

| <b>Macrovascular characteristics</b>                            | <b>P5</b> | <b>P10</b> | <b>P25</b> | <b>P50</b> | <b>P75</b> | <b>P90</b> | <b>P95</b> |
|-----------------------------------------------------------------|-----------|------------|------------|------------|------------|------------|------------|
| <b>Age, y</b>                                                   | 4.1       | 4.2        | 4.3        | 4.5        | 4.8        | 5.1        | 5.4        |
| <b>Height, cm</b>                                               | 100.2     | 102.0      | 104.4      | 107.5      | 111.0      | 114.3      | 116.0      |
| <b>Weight, kg</b>                                               | 15.1      | 15.9       | 17.0       | 18.4       | 20.3       | 22.1       | 23.6       |
| <b>BMI, kg/m<sup>2</sup></b>                                    | 14.0      | 14.4       | 15.1       | 16.0       | 16.9       | 17.8       | 18.7       |
| <b>Systolic blood pressure, mmHg</b>                            | 83.6      | 88.4       | 93.4       | 97.3       | 102.3      | 108.6      | 112.6      |
| <b>Diastolic blood pressure, mmHg</b>                           | 43.9      | 46.0       | 50.3       | 53.7       | 58.3       | 63.6       | 67.2       |
| <b>Heart rate, beats per minute</b>                             | 74.6      | 77.8       | 83.7       | 89.7       | 96.7       | 102.3      | 107.0      |
| <b>Carotid intima-media thickness, <math>\mu\text{m}</math></b> | 382.9     | 401.0      | 433.9      | 486.2      | 525.8      | 587.9      | 604.1      |
| <b>Pulse wave velocity, m/s</b>                                 | 2.7       | 2.9        | 3.2        | 3.6        | 4.1        | 4.7        | 5.2        |
| <b>Distensibility coefficient, <math>10^{-23}</math> /kPa</b>   | 23.4      | 37.0       | 55.9       | 71.5       | 92.0       | 115.1      | 137.9      |
| <b>Young's elastic modulus, kPa</b>                             | 73.1      | 90.1       | 111.2      | 150.0      | 186.7      | 259.6      | 327.8      |
| <b>Carotid distension, <math>\mu\text{m}</math></b>             | 460.7     | 545.1      | 661.2      | 778.3      | 880.2      | 966.7      | 1027.8     |
| <b>Stiffness index <math>\beta</math></b>                       | 2.1       | 2.6        | 3.2        | 3.9        | 4.8        | 6.1        | 7.8        |
| <b>Compliance coefficient, (mm<sup>2</sup>/kPa)</b>             | 0.7       | 1.0        | 1.3        | 1.6        | 1.9        | 2.3        | 2.6        |

Table S2. Percentile tables for macrovascular characteristics for boys and girls.

| Macrovascular characteristics                        | Boys  |       |       |       |       |       |        | Girls |       |       |       |       |       |       |
|------------------------------------------------------|-------|-------|-------|-------|-------|-------|--------|-------|-------|-------|-------|-------|-------|-------|
|                                                      | P5    | P10   | P25   | P50   | P75   | P90   | P95    | P5    | P10   | P25   | P50   | P75   | P90   | P95   |
| Age, y                                               | 4.1   | 4.2   | 4.3   | 4.5   | 4.8   | 5.1   | 5.4    | 4.1   | 4.2   | 4.3   | 4.5   | 4.7   | 5.0   | 5.2   |
| Height, cm                                           | 101.5 | 102.5 | 104.4 | 107.5 | 111.0 | 114.2 | 115.0  | 100.0 | 101.5 | 104.4 | 107.6 | 110.5 | 114.9 | 116.5 |
| Weight, kg                                           | 15.2  | 16.0  | 17.2  | 18.4  | 20.3  | 21.8  | 23.6   | 14.8  | 15.6  | 17.0  | 18.4  | 20.4  | 22.2  | 23.3  |
| BMI, kg/m <sup>2</sup>                               | 14.0  | 14.4  | 15.2  | 16.0  | 16.9  | 17.6  | 18.3   | 14.0  | 14.4  | 15.0  | 16.0  | 17.0  | 18.1  | 18.7  |
| Systolic blood pressure, mmHg                        | 83.4  | 88.1  | 93.3  | 97.3  | 102.6 | 107.9 | 113.4  | 84.0  | 90.0  | 93.9  | 97.3  | 101.8 | 109.0 | 112.0 |
| Diastolic blood pressure, mmHg                       | 43.0  | 45.1  | 49.1  | 53.0  | 57.6  | 63.3  | 68.9   | 44.3  | 47.0  | 51.0  | 54.7  | 60.1  | 64.3  | 66.3  |
| Heart rate, beats per minute                         | 72.4  | 77.7  | 84.7  | 89.3  | 96.3  | 100.6 | 107.0  | 76.3  | 78.0  | 82.9  | 90.0  | 96.8  | 102.3 | 106.3 |
| Carotid intima-media thickness, $\mu\text{m}$        | 383.6 | 404.5 | 441.0 | 486.8 | 541.5 | 590.4 | 604.6  | 378.6 | 396.8 | 432.6 | 484.0 | 521.6 | 582.5 | 604.3 |
| Pulse wave velocity, m/s                             | 2.6   | 2.8   | 3.1   | 3.6   | 4.1   | 4.8   | 5.5    | 2.8   | 3.0   | 3.2   | 3.6   | 4.1   | 4.6   | 5.0   |
| Distensibility coefficient, $10^{-23}/\text{kPa}$    | 33.0  | 41.1  | 54.1  | 72.8  | 95.9  | 125.1 | 152.9  | 29.0  | 43.0  | 60.5  | 72.1  | 90.4  | 106.1 | 128.3 |
| Young's elastic modulus, kPa                         | 64.0  | 79.8  | 108.0 | 152.4 | 196.0 | 266.2 | 348.0  | 79.5  | 92.7  | 112.3 | 149.0 | 183.4 | 237.1 | 309.8 |
| Carotid distension, $\mu\text{m}$                    | 455.0 | 533.4 | 662.5 | 791.5 | 889.2 | 995.9 | 1055.0 | 506.2 | 548.9 | 645.8 | 765.3 | 861.7 | 913.1 | 957.5 |
| Stiffness index $\beta$                              | 1.6   | 2.5   | 3.2   | 4.0   | 4.8   | 6.3   | 8.3    | 2.4   | 2.7   | 3.3   | 3.9   | 4.9   | 5.9   | 7.3   |
| Compliance coefficient, ( $\text{mm}^2/\text{kPa}$ ) | 0.5   | 0.9   | 1.2   | 1.5   | 2.0   | 2.4   | 2.7    | 0.8   | 1.0   | 1.3   | 1.6   | 1.9   | 2.2   | 2.5   |
